# Supplementary material for: Shortened TDP43 isoforms upregulated by neuronal hyperactivity drive TDP43 pathology in ALS
Source: bioRxiv or medRxiv preprint supplement (doi:10.1101/648477), 2019-11-06
Supplement: Supplementary file [file media-1.pdf]

**Title:** Neuronal hyperexcitability drives TDP43 pathology by upregulating shortened TDP43 protein isoforms

**Key Words:** TDP43, ALS, hyperexcitability, alternative splicing, TDP43 pathology, iPSC, iNeuron

**Authors:** Kaitlin Weskamp<sup>1,2</sup>, Elizabeth M. Tank<sup>1</sup>, Roberto Miguez<sup>1</sup>, Nicolás B. Gómez<sup>1,3</sup>, Matthew White<sup>4</sup>, Zigiang Lin<sup>4</sup>, Carmen Moreno Gonzalez<sup>5</sup>, Andrea Serio<sup>5</sup>, Jemeen Sreedharan<sup>4</sup>, Sami J. Barmada<sup>1,2,3,\*</sup>

**Affiliations:** <sup>1</sup>Department of Neurology, <sup>2</sup>Neuroscience Graduate Program, <sup>3</sup>Cellular and Molecular Biology Program, University of Michigan, Ann Arbor, MI, USA; <sup>4</sup>Department of Basic and Clinical Neuroscience, <sup>5</sup>Centre for Craniofacial and Regenerative Biology, King's College London, London, UK.

**\* To whom correspondence should be addressed:**

Sami Barmada

University of Michigan, Department of Neurology

109 Zina Pitcher Place, BSRB 5015

Ann Arbor, MI 48109

[sbarmada@umich.edu](mailto:sbarmada@umich.edu)

## **Supplemental Materials and Methods**

### **RNA-sequencing**

We utilized previously described RNA sequencing(seq) data<sup>1,2</sup>, and determined transcript abundance as described above.

## **Tissue preparation and immunohistochemistry in murine tissue**

Vertebral columns were dissected from 5 month old C57Bl6 J mice, fixed in 4% paraformaldehyde (PFA) at 4°C for 48h, washed in phosphate buffered saline (PBS), and dissected to extract the spinal cords. The lumbar enlargement was sub-dissected, cryoprotected in 30% sucrose at 4°C, embedded in M1 matrix (Thermo Scientific #1310) in a silicone mold, frozen on dry ice, and sectioned at a thickness of 16µm onto charged slides (Thermo Scientific J1800AMNZ). Sections were then briefly air dried and stored at -80°C. For immunohistochemistry (IHC), sections were washed in distilled water, and blocked and permeabilized in blocking buffer (5% BSA, 0.5% Triton X-100, and 5% goat serum (Gibco 16210-064)) for 1h at room temperature. Slides were then incubated with primary antibody at 4°C overnight in blocking buffer diluted 2-fold with PBS (Supplemental Table 4). Sections were washed 3x for 5m in PBS, then incubated at room temperature for 1h with Alexa Fluor goat anti-mouse 488 (Life Technologies AB150113), Alexa Fluor donkey anti-goat 647 (Life Technologies AB150131), and Alexa Fluor goat anti-rabbit 568 (Life Technologies AB175470) secondary antibodies diluted 1:500 in blocking solution. Sections were then washed 3x for 5m, counterstained, and mounted with Vectashield Hardset with DAPI (Vector Labs H-1500). Images were acquired using Olympus Whole Slide Scanner (VS120) with a 40x objective.

## **Differentiation of iPSC-derived astrocytes**

iPSC-derived astrocyte progenitors were derived, cultured, and expanded as described previously<sup>3</sup>. The glial progenitors were pre-differentiated in Neurobasal Medium containing 1% B27 Supplement, 1% NEAA, and 1% PS for 10d on 6-well plates before cryopreservation. Before the experiment, batches of pre-differentiated astrocytes were defrosted and plated at 50k per well in 8-well Ibidi imaging chambers (Ibidi 80841), and cultured for an additional 6 days in Neurobasal Medium containing 1% B27, 1% NEAA, 1% PS, and 20 ng/mL ciliary neurotrophic factor (CNTF,

Thermo Fisher PHC7015). Astrocytes were then fixed in 4% PFA for 15m and immunostained as described above (Supplemental Table 4) using Alexa Fluor goat anti-rabbit 647 (Thermo Fisher A-21245) and Alexa Fluor goat anti-mouse IgG1 (Thermo Fisher A-21121) secondary antibodies diluted 1:1000 in 3% goat serum in PBS. Imaging was performed on a Leica DMI8 with CoolLED light source at 63x and analyzed with ImageJ.

## **Supplemental Figure Legends**

### **Supplemental Figure 1. TDP43 abundance is modulated by neuronal activity.**

(A) Western blot demonstrating an increase in TDP43 abundance in iNeurons stimulated with TEA, and a reduction in TDP43 levels upon inhibition with TTX. (B) Quantification of TDP43 abundance normalized to a GAPDH loading control, relative to vehicle-treated (V) neurons (3 experimental replicates, \* $p < 0.05$ , \*\*\* $p < 0.001$ , \*\*\*\* $p < 0.0001$ , one-way ANOVA with Dunnett's post-test). (C) Rodent primary mixed cortical neurons exhibited similar increases in TDP43 abundance with bicuculline, and reductions in TDP43 levels with TTX. (D) Quantification of TDP43 abundance normalized to GAPDH, relative to vehicle-treated (V) neurons (3 experimental replicates, \* $p < 0.05$ , one-way ANOVA with Dunnett's post-test).

### **Supplemental Figure 2. sTDP43 is deficient in splicing activity.**

(A) Schematic of the *CFTR* minigene reporter. TDP43-mediated splicing of the reporter results in exon 9 exclusion. Arrows indicate primers used to amplify the splice junction. (B-C) EGFP-flTDP43, but not EGFP-sTDP43, effectively excludes *CFTR* exon 9 in HEK293T cells overexpressing the reporter (3 replicates, \* $p < 0.05$ , one-way ANOVA, Dunnett's post-test).

### **Supplemental Figure 3. sTDP43 autoregulatory function is impaired.**

(A) Schematic of the TDP43 autoregulation reporter in which the fluorescent protein mCherry is fused to the *TARDBP* 3' UTR. (B) Rodent primary mixed cortical neurons overexpressing EGFP-flTDP43 show a significant reduction in reporter signal, consistent with autoregulation, while those overexpressing EGFP-sTDP43 do so to a lesser degree (EGFP n=2044, EGFP-flTDP43 n=2375, EGFP-sTDP43 n=2208, 3 replicates, \*\*\*\*p<0.0001, one-way ANOVA, Dunnett's post-test). (C) Fluorescence microscopy of rodent primary mixed cortical neurons demonstrating reduced reporter fluorescence in neurons co-expressing EGFP-flTDP43, in comparison to those co-expressing EGFP or EGFP-sTDP43. Scale bar in (C), 10  $\mu$ m.

**Supplemental Figure 4. sTDP43 colocalizes with components of stress granules.**

(A) HEK293T cells were transfected with EGFP-tagged sTDP43 and immunostained using antibodies against the stress granule marker G3BP1 and endogenous TDP43. (B) Overexpressed sTDP43-EGFP colocalizes with endogenous TDP43 and stress granule markers G3BP1 and TIA1 in HEK293T cells treated with 0.4M sorbitol. Scale bar in (A) 20  $\mu$ m, scale bar in (B), 10  $\mu$ m.

**Supplemental Figure 5. sTDP43 transcripts are present in a variety of tissue types and disease states.**

(A) Summary of previously published RNA-seq studies analyzed for sTDP43. (B) sTDP43-1 represents 30% of *TARDBP* transcripts in spinal cord ventral horn homogenate isolated from both control and sALS patients, with the remainder corresponding to flTDP43. (C) Similarly, sTDP43-1 makes up 30% of *TARDBP* transcripts in cerebellum, and 55% of *TARDBP* transcripts in frontal cortex. In each case, sTDP43-2 transcripts were largely undetectable, and there was no significant change in transcript isoform abundance in C9ALS or sALS patients compared to controls.

**Supplemental Figure 6. Endogenous sTDP43 is expressed by neurons and glia in murine lumbar spinal cord.**

Immunohistochemistry in murine spinal cord, showing colocalization of sTDP43 immunoreactivity (green) with the neuronal marker NeuN (red) in the ventral horn (**A**) and with the astrocytic marker GFAP (**B**, purple). Scale bars (**A**) and (**B**), 200  $\mu\text{m}$ .

**Supplemental Figure 7. Endogenous sTDP43 is produced by human iPSC-derived astrocytes.**

(**A**) Immunocytochemistry using antibodies against flTDP43 (red) and sTDP43 (green) in astrocytes differentiated from human iPSCs. (**B**) Reflecting their unique subcellular distributions, flTDP43 displays a significantly higher nuclear-cytoplasmic ratio (NCR) than sTDP43 (3 replicates, flTDP43 n=136, sTDP43 n=136, \*\*\*\*p<0.0001, two-tailed t-test). Scale bar in (**A**) 10  $\mu\text{m}$ .

**Supplemental Table 1. Amino acid sequence of the sTDP43 C-terminal tail is conserved in humans, non-human primates, and lesser mammals.**

**Supplemental Table 2. Nucleotide sequence of the sTDP43-1 and -2 splice junctions are conserved in humans, non-human primates, and lesser mammals.**

**Supplemental Table 3. Constructs and primer sequences used to generate iPSC lines**

**Supplemental Table 4. Primary Antibodies**

**Supplemental Table 5. Primers used in RT PCR and CFTR Assays**

## Supplemental Table 6. Source and Construction of Plasmid Vectors

### Supplemental Bibliography

1. Prudencio, M. *et al.* Distinct brain transcriptome profiles in C9orf72-associated and sporadic ALS. *Nat. Neurosci.* **18**, 1175–1182 (2015).
2. D'Erchia, A. M. *et al.* Massive transcriptome sequencing of human spinal cord tissues provides new insights into motor neuron degeneration in ALS. *Sci. Rep.* **7**, 10046 (2017).
3. Serio, A. *et al.* Astrocyte pathology and the absence of non-cell autonomy in an induced pluripotent stem cell model of TDP-43 proteinopathy. *Proceedings of the National Academy of Sciences* **110**, 4697–4702 (2013).

# Supplemental Figure 1.

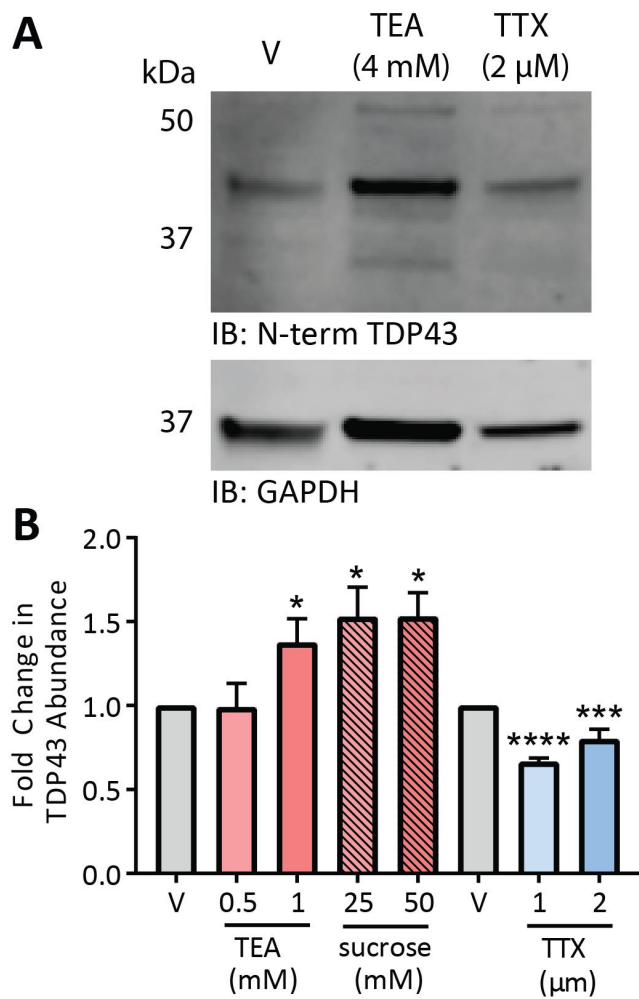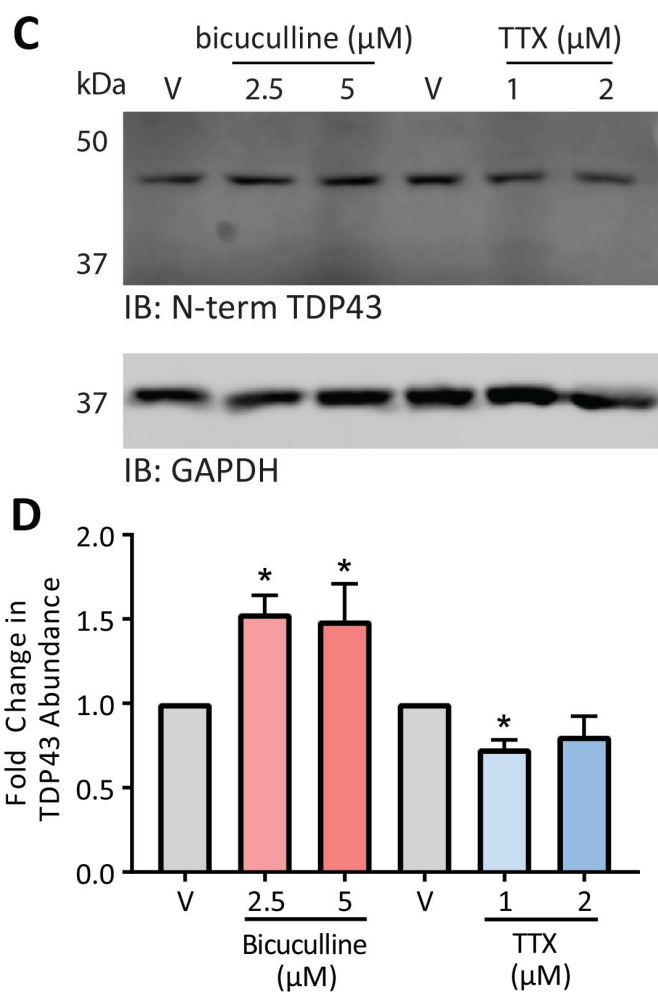

# Supplemental Figure 2.

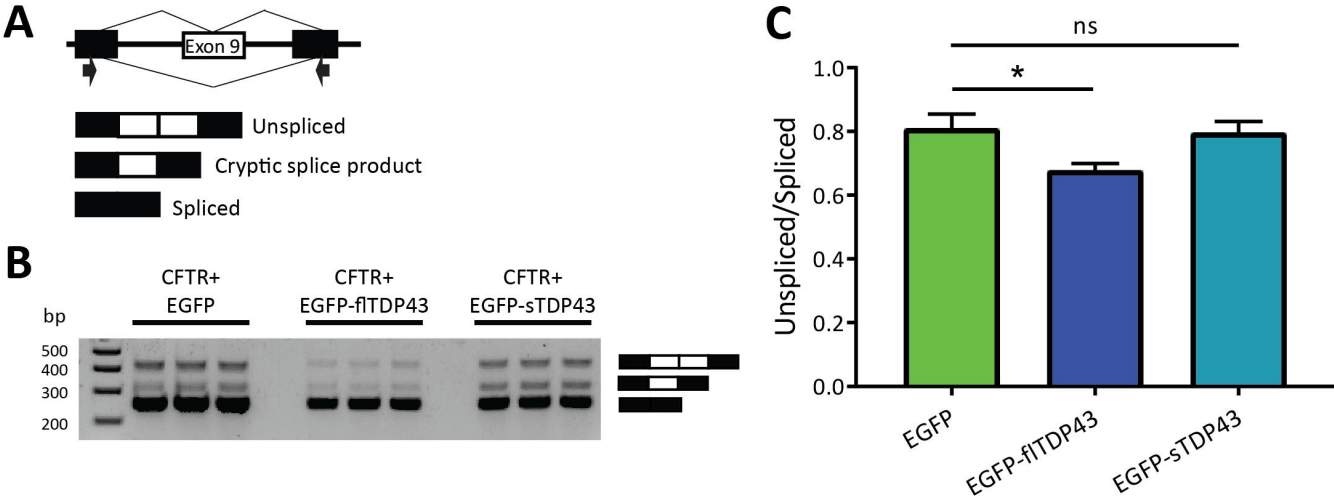



Supplemental Figure 3.

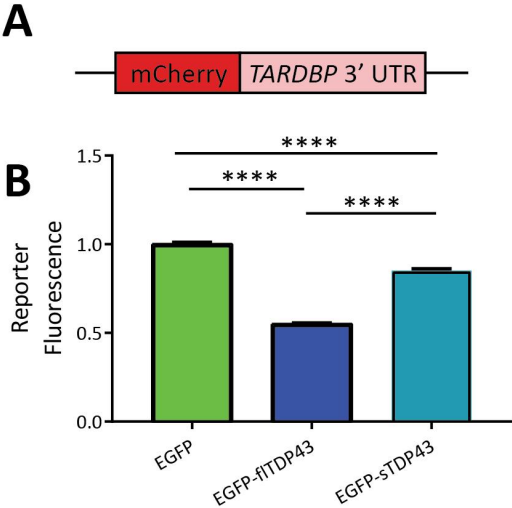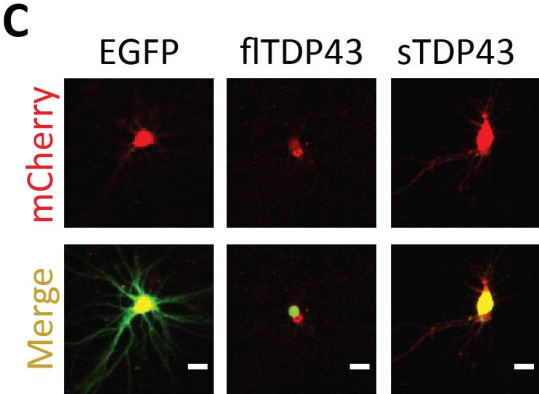

# Supplemental Figure 4.

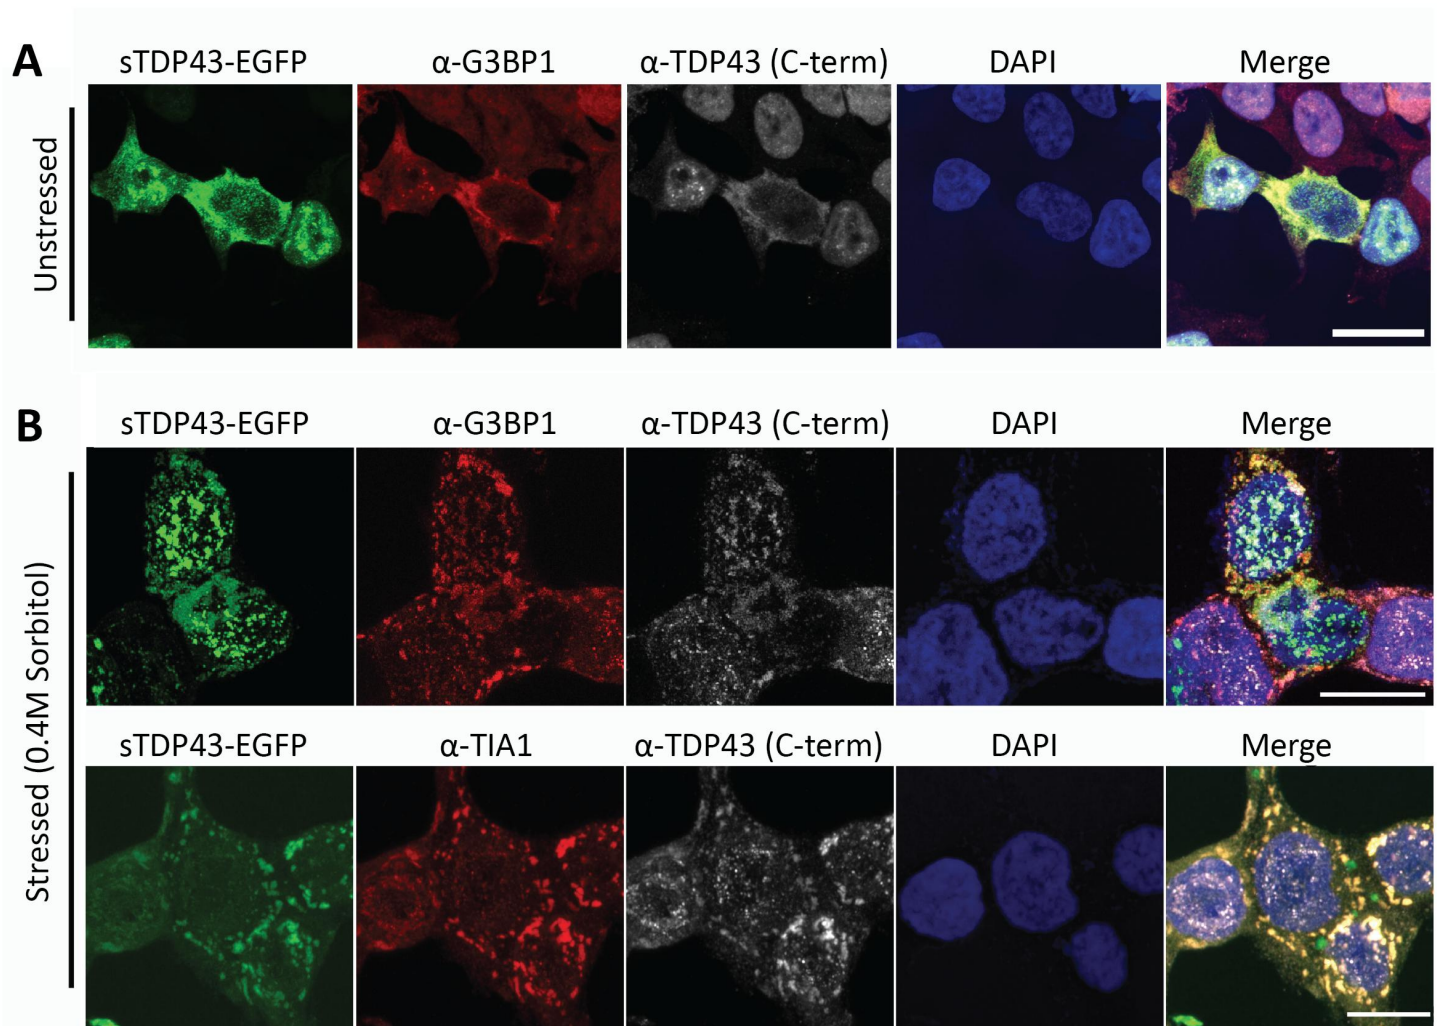

# Supplemental Figure 5.

**A**

| Original Study        | Species | Library preparation                       | Read Length    | Cell or Tissue Type                | Disease Condition        | n  |
|-----------------------|---------|-------------------------------------------|----------------|------------------------------------|--------------------------|----|
| White et al. 2018     | Mouse   | Clontech SMART-seq and Illumina Nextera X | 100 bp, paired | Laser captured spinal motor neuron | Wildtype                 | 4  |
| White et al. 2018     | Mouse   | Illumina TruSeq                           | 100 bp, paired | Frontal cortex                     | Wildtype                 | 6  |
| Krach et al. 2018     | Human   | NuGEN Ovation                             | 50 bp, single  | Laser captured spinal motor neuron | Control and sALS         | 21 |
| D'Erchia et al. 2017  | Human   | Illumina TruSeq                           | 100 bp, paired | Ventral horn spinal cord           | Control and sALS         | 11 |
| Preduncio et al. 2015 | Human   | Illumina TruSeq                           | 100 bp, paired | Cerebellum and Frontal cortex      | Control, C9ALS, and sALS | 53 |

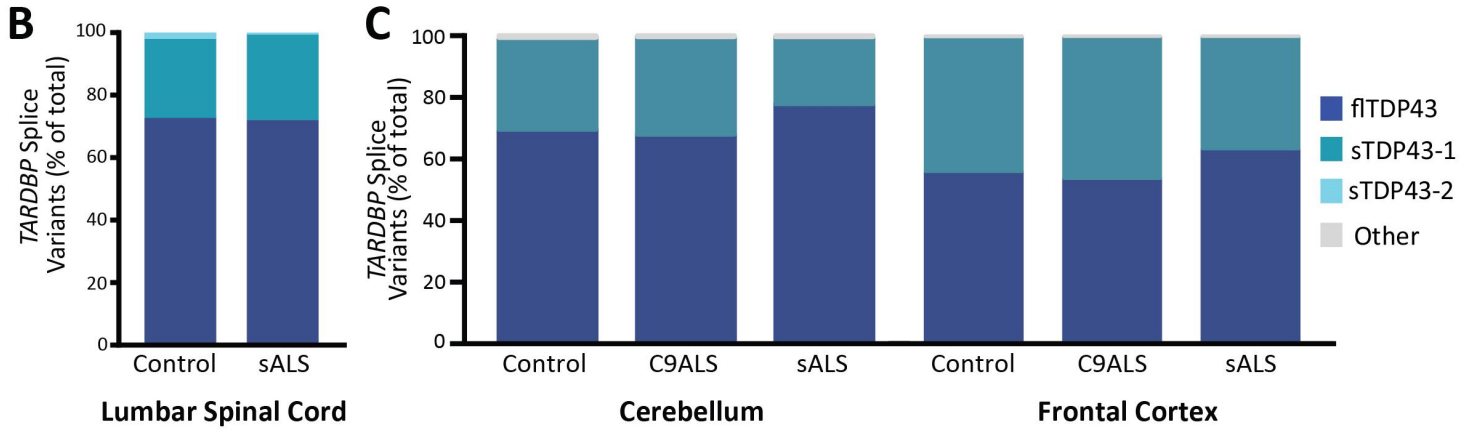

# Supplemental Figure 6.

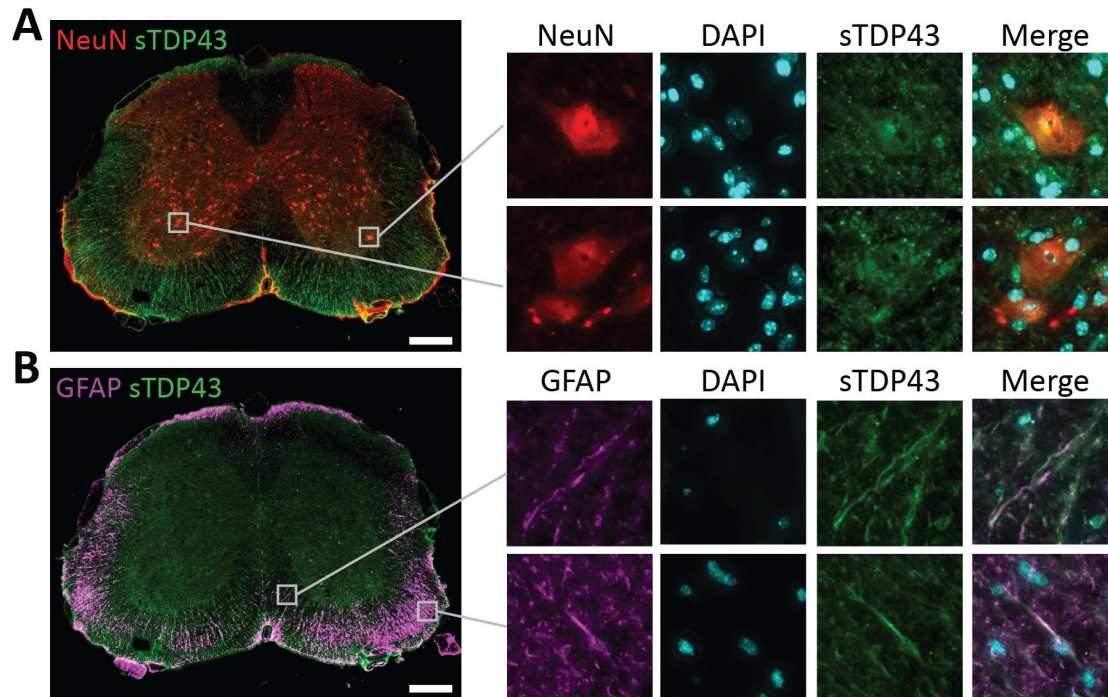

Supplemental Figure 7.

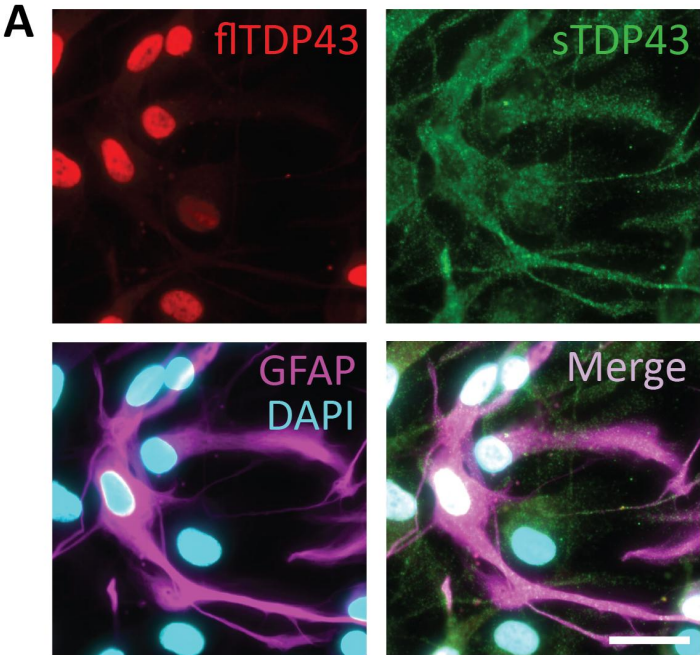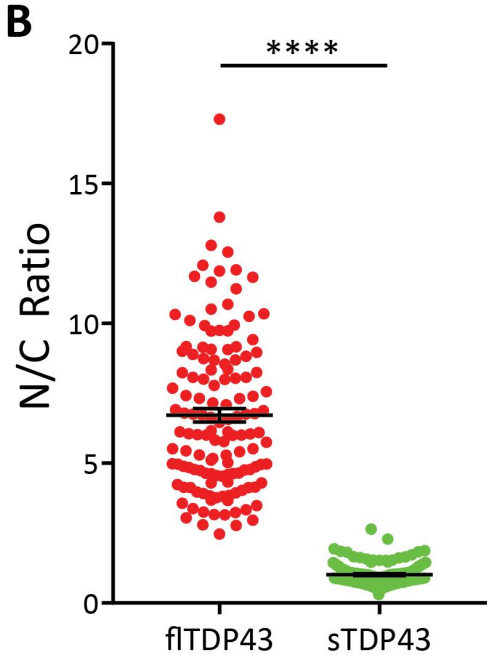

Supplemental Table 1. Amino acid sequence of the sTDP43 C-terminal tail is conserved in humans, non-human primates, and lesser mammals.

| Species                                                         | Amino Acid Sequence |   |   |   |   |   |   |   |   |   |   |   |   |   |   |   |   |   |
|-----------------------------------------------------------------|---------------------|---|---|---|---|---|---|---|---|---|---|---|---|---|---|---|---|---|
| <i>Reference Sequence</i>                                       | V                   | H | L | I | S | N | V | Y | G | R | S | T | S | L | K | V | V | L |
| Chimpanzee ( <i>Pan troglodytes</i> )                           | V                   | H | L | I | S | N | V | Y | G | R | S | T | S | L | K | V | V | L |
| Orangutan ( <i>Pongo abelii</i> )                               | V                   | H | L | I | S | N | V | Y | G | R | S | T | S | L | K | V | V | L |
| Baboon ( <i>Papio anubis</i> )                                  | V                   | H | L | I | S | N | V | Y | G | R | S | T | S | L | K | V | V | L |
| Drill ( <i>Mandrillus leucophaeus</i> )                         | V                   | H | L | I | S | N | V | Y | G | R | S | T | S | L | K | V | V | L |
| Black and white colobus ( <i>Colobus angolensis palliatus</i> ) | V                   | H | L | I | S | N | V | Y | G | R | S | T | S | L | K | V | V | L |
| Goat ( <i>Capra hircus</i> )                                    | V                   | H | L | I | S | N | V | Y | G | R | S | T | S | L | K | V | V | L |
| Cat ( <i>Felis catus</i> )                                      | V                   | H | L | I | S | N | V | Y | G | R | S | T | S | L | K | V | V | L |
| Alpine marmot ( <i>Marmota marmota marmota</i> )                | V                   | H | L | I | S | N | V | Y | G | R | S | T | S | L | K | V | V | L |
| Long-tailed chincilla ( <i>Chinchilla lanigera</i> )            | V                   | H | L | I | S | N | V | Y | G | R | S | T | S | L | K | V | V | L |
| Ground squirrel ( <i>Ictidomys tridecemlineatus</i> )           | V                   | H | L | I | S | N | V | Y | G | R | S | T | S | L | K | V | V | L |
| Kangaroo rat ( <i>Dipodomys ordii</i> )                         | V                   | H | L | I | S | N | V | Y | G | R | S | T | S | L | K | V | V | L |
| Guinea pig ( <i>Cavia porcellus</i> )                           | V                   | H | L | I | S | N | V | Y | G | R | S | T | S | L | K | V | V | L |
| Brown rat ( <i>Rattus norvegicus</i> )                          | V                   | H | L | I | S | N | V | Y | G | R | S | T | S | L | K | V | V | L |
| Darama mole rat ( <i>Fukomys damarensis</i> )                   | V                   | H | L | I | S | N | V | Y | G | R | S | T | S | L | K | V | V | L |
| Blind Mole Rat ( <i>Nannospalax galili</i> )                    | V                   | H | L | I | S | N | V | Y | G | R | S | T | S | L | K | V | V | L |
| Golden hamster ( <i>Mesocricetus auratus</i> )                  | V                   | H | L | I | S | N | V | Y | G | R | S | T | S | L | K | V | V | L |
| Deer mouse ( <i>Peromyscus maniculatus bairdii</i> )            | V                   | H | L | I | S | N | V | Y | G | R | S | T | S | L | K | V | V | L |
| House mouse ( <i>Mus musculus</i> )                             | V                   | H | L | I | S | N | V | Y | G | R | S | T | S | L | K | V | V | L |
| Naked mole rat ( <i>Heterocephalus glaber</i> )                 | V                   | H | L | I | S | N | V | F | G | R | S | T | S | L | K | V | V | L |
| Horse ( <i>Equus caballus</i> )                                 | V                   | H | L | M | S | N | V | Y | G | R | S | T | S | L | K | V | V | L |
| Tibetan antelope ( <i>Pantholops hodgsonii</i> )                | V                   | H | L | I | S | N | V | H | G | R | S | T | S | L | K | V | V | L |
| Chinese tree shrew ( <i>Tupaia chinensis</i> )                  | V                   | H | L | I | S | N | V | S | G | R | S | T | S | L | K | V | V | L |

**Supplemental Table 2. Nucleotide sequence of the sTDP43-1 and -2 splice junctions are conserved in humans, non-human primates, and lesser mammals.**

| <b>Species</b>                                                          | <b>Isoform 1 Identity</b> | <b>Isoform 2 Identity</b> |
|-------------------------------------------------------------------------|---------------------------|---------------------------|
| Baboon ( <i>Papio anubis</i> )                                          | 99%                       | 99%                       |
| Drill ( <i>Mandrillus leucophaeus</i> )                                 | 96%                       | 96%                       |
| Angolan black and white colobus ( <i>Colobus angolensis palliatus</i> ) | 96%                       | 96%                       |
| Goats ( <i>Capra hircus</i> )                                           | 96%                       | 96%                       |
| Chinese tree shrew ( <i>Tupaia chinensis</i> )                          | 96%                       | 96%                       |
| Horse ( <i>Equus caballus</i> )                                         | 96%                       | 96%                       |
| Cat ( <i>Felis catus</i> )                                              | 96%                       | 96%                       |
| Ground Squirrel ( <i>Ictidomys tridecemlineatus</i> )                   | 96%                       | 96%                       |
| Shrew ( <i>Mus pahari</i> )                                             | 96%                       | 96%                       |
| Brown rat ( <i>Rattus norvegicus</i> )                                  | 96%                       | 96%                       |
| Deer mouse ( <i>Peromyscus maniculatus bairdii</i> )                    | 96%                       | 96%                       |
| Prairie vole ( <i>Microtus ochrogaster</i> )                            | 96%                       | 96%                       |
| House mouse ( <i>Mus musculus</i> )                                     | 96%                       | 96%                       |
| Ryukyu mouse ( <i>Mus caroli</i> )                                      | 96%                       | 96%                       |
| Damaraland mole rat ( <i>Fukomys damarensis</i> )                       | 96%                       | 96%                       |
| Tibetan antelope ( <i>Pantholops hogsonii</i> )                         | 96%                       | 96%                       |
| Blind mole rat ( <i>nannospalax galili</i> )                            | 96%                       | 96%                       |
| Chinese hamster ( <i>Cricetulus griseus</i> )                           | 95%                       | 95%                       |
| Guinea pig ( <i>Cavia procellus</i> )                                   | 95%                       | 95%                       |
| Golden hamster ( <i>Mesocricetus auratus</i> )                          | 95%                       | 92%                       |
| Lesser Egyptian jerboa ( <i>Jaculus jaculus</i> )                       | 95%                       | 93%                       |
| Cow ( <i>Bos taurus</i> )                                               | 95%                       | 95%                       |

**Supplemental Table 3. Constructs used for generation of iPSC Lines**

| Construct                               | Source                                 | Complementary Oligomers | Sequence (5' to 3')       |
|-----------------------------------------|----------------------------------------|-------------------------|---------------------------|
| pUCM-CLYBL-NGN1-2-RFP                   | Gift from M. Ward                      |                         |                           |
| pLTC13-L1                               | Gift from M. Ward                      |                         |                           |
| pLTC13-R1                               | Gift from M. Ward                      |                         |                           |
| pX335-U6-Chimeric_BB-CBh-hSpCas9n(D10A) | Addgene (42335, donated by Feng Zhang) |                         |                           |
| pX330S-4                                | Addgene (58780, donated by Feng Zhang) |                         |                           |
| pUCM-N-term-TARDBP-D2-HDR               | Synthesized by Blue Heron, LLC         |                         |                           |
| pX335-sgRNA-D2-TDP43-Upstream           | This paper                             | Sense                   | GACCGTTCATATCTCTTTCTCTTT  |
|                                         |                                        | Antisense               | AAACAAAGAGAAAAGAGATATGAAC |
| pX335-sgRNA-D2-TDP43-Downstream         | This paper                             | Sense                   | CACCGGGGCTCATCGTTCTCATCTT |
|                                         |                                        | Antisense               | AAACAAGATGAGAACGATGAGCCCC |
| pUCM-C-term-TARDBP-D2-HDR               | Synthesized by Blue Heron, LLC         |                         |                           |
| pX335-sgRNA-TDP43-D2-Upstream           | This paper                             | Sense                   | CACCGTTGGTTGGTATAGAATGG   |
|                                         |                                        | Antisense               | AAACCCATTCTATACCAACCAACC  |
| pX335-sgRNA-TDP43-D2-Downstream         | This paper                             | Sense                   | CACCGACCACTGCCCGACCTGCAT  |
|                                         |                                        | Antisense               | AAACATGCAGGGTCGGGCAGTGGTC |



**Supplemental Table 4. Primary antibodies**

| Antibody     | Source                                   | Catalog Number | Species | Dilution                                                                                      |
|--------------|------------------------------------------|----------------|---------|-----------------------------------------------------------------------------------------------|
| Vglut1       | Synaptic Systems                         | 135303         | rabbit  | 1:200 for ICC in iNeurons                                                                     |
| Tuj1         | BioLegend                                | 801202         | mouse   | 1:500 for ICC in iNeurons                                                                     |
| N-term TDP43 | Sephton et al. 2011; Barmada et al. 2014 | NA             | rabbit  | 1:5000 for ICC and western                                                                    |
| C-term TDP43 | Sephton et al. 2011; Barmada et al. 2014 | NA             | rabbit  | 1:5000 for ICC and western                                                                    |
| sTDP43       | Custom-made from Genscript               | NA             | rabbit  | 1:1000 for ICC and western<br>1:500 for murine IHC<br>1:250 for human IHC                     |
| Map2         | Milipore                                 | MAB3418        | mouse   | 1:1000 for ICC in iNeurons                                                                    |
| GAPDH        | Milipore                                 | MAB374         | mouse   | 1:1000 for ICC in iNeurons                                                                    |
| GFAP         | Abcam                                    | AB53554        | goat    | 1:500 for murine IHC                                                                          |
| NeuN         | Abcam                                    | AB104225       | mouse   | 1:500 for murine IHC                                                                          |
| GFAP         | Milipore                                 | AB5541         | chicken | 1:500 for human IHC                                                                           |
| NeuN         | Milipore                                 | MAB377         | mouse   | 1:250 for human IHC                                                                           |
| TDP43        | R&D Biosystems                           | MAB7778        | mouse   | 1:1000 for western and ICC<br>1:500 for ICC in iPSC-derived astrocytes<br>1:250 for human IHC |
| GFAP         | Sigma                                    | C9205          | mouse   | 1:500 for ICC in iPSC-derived astrocytes                                                      |

**Supplemental Table 5. Primers used in qRT-PCR and CFTR splicing assays**

| <b>Target</b>           | <b>Location</b>             | <b>Primer</b> | <b>Sequence (5' to 3')</b>        |
|-------------------------|-----------------------------|---------------|-----------------------------------|
| ARC                     | ARC exon 2                  | Forward       | CCTGTACCAGACGCTCTACG              |
|                         |                             | Reverse       | GCAGGAAACGCTTGAGCTTG              |
| Total TARDBP            | TARDBP exon 1 and 2         | Forward       | CTGCTTCGGTGTCCCTGTC               |
|                         |                             | Reverse       | TGGGCTCATCGTTCTCATCT              |
| full-length (fl) TARDBP | TARDBP exon 6 stop codon    | Forward       | GTGGCTCTAATTCTGGTGACG             |
|                         |                             | Reverse       | CACAACCCCACTGTCTACATT             |
| sTDP43-1                | sTDP43-1 splice donor       | Forward       | AGAAGTGGAAGATTTGGTGTCA            |
|                         |                             | Reverse       | GCATGTAGACAGTATTCCTATGGC          |
| sTDP43-2                | sTDP43-2 splice donor       | Forward       | AGATTTGGTGGTAATCCAGTTCA           |
|                         |                             | Reverse       | GGCCTGTGATGCGTGATGA               |
| CFTR minigene           | CFTR exon 9 splice junction | Forward       | CAACTTCAAGCTCCTAAGCCACTGC         |
|                         |                             | Reverse       | TAGGATCCGGTCACCAGGAAGTTGGTTAAATCA |

Supplemental Table 6. Source and construction of plasmid vectors

| Plasmid                                                    | Source                                                | Amplicon or Insert      | Primer  | Sequence (5' to 3')                                           |
|------------------------------------------------------------|-------------------------------------------------------|-------------------------|---------|---------------------------------------------------------------|
| pGW1-mApple                                                | Barmada et al. 2014                                   |                         |         |                                                               |
| pGW1-EGFP(1)                                               | Arrasate et al. 2004                                  |                         |         |                                                               |
| pGW1-TDP43-EGFP                                            | Barmada et al. 2014                                   |                         |         |                                                               |
| pGW1-sTDP43-EGFP                                           | This paper                                            | sTDP43                  | NA      |                                                               |
| pGW1-sTDP43(mNES)-EGFP                                     | This paper                                            | sTDP43(mNES)            | Forward | CGCGGGCCCATGTCTGAATATATTCG                                    |
|                                                            |                                                       |                         | Reverse | GCGACCGGTGCGACGACTCCACCCCTCCGGCCCTCTCCATAAAC                  |
| pGW1-EGFP(2)                                               | This paper                                            | EGFP                    | Forward | GCGAAGCTTGCCACCATGGTAGCAAG                                    |
|                                                            |                                                       |                         | Reverse | CGCGGTACCCTTGTACAGCTCGTCCAT                                   |
| pGW1-EGFP-tail                                             | This paper                                            | tail                    | Forward | CGTTCATCTCATTCAAATGTTTATGGAAGAAGCACTTCATTGAAAGTAGTGTAAAG      |
|                                                            |                                                       |                         | Reverse | CTAGCTTACAGCACTACTTCAATGAAGTCTCTCCATAAACATTGAAATGAGATGAACGGTA |
| pGW1-EGFP-tail(mNES)                                       | This paper                                            | tail(mNES)              | Forward | CGTTCATCTCATTCAAATGTTTATGGAAGAAGCGGGGAGGGGGTGGAGTGTCTAAAG     |
|                                                            |                                                       |                         | Reverse | CTAGCTTACAGCACTCCACCCCTCCGGCTCTCCATAAACATTGAAATGAGATGAACGGTA  |
| pGW1-EGFP- $\beta$ TDP43                                   | This paper                                            | TDP43                   | Forward | GCG GGT ACC ATG TCT GAA TAT ATT CGG                           |
|                                                            |                                                       |                         | Reverse | CGC GCT AGC TTA TCC CCA GCC AGA AG                            |
| pGW1-EGFP-sTDP43                                           | This paper                                            | sTDP43                  | Forward | GCGGGTACCATGTCTGAATATATTCGG                                   |
|                                                            |                                                       |                         | Reverse | CGCGCTAGCTTACAGCACTACTTCAATG                                  |
| pGW1-Halo                                                  | This paper                                            | Halo                    | Forward | AAAAAA TCTAGA GCCACCATGGCAGAAATCGG                            |
|                                                            |                                                       |                         | Reverse | AAAAAA CTGCAGG CTA GGAAATCTCGAGCTCGACA                        |
| pGW1- $\beta$ TDP43-Halo                                   | This paper                                            | TDP43, Halo             | Forward | AAAAAA TCTAGA ATGGCAGAAATCGTACTGG                             |
|                                                            |                                                       |                         | Reverse | AAAAAA CTGCAGG CTA GGAAATCTCGAGCTCGACA                        |
| pGW1-sTDP43-Halo                                           | This paper                                            | sTDP43                  | Forward | GCG GCTAGC GCCACC ATGTCTGAATATATTCG                           |
|                                                            |                                                       |                         | Reverse | GCGACCGGTGGCAGCACTACTTC                                       |
| pCaggs-mCherry-TARDBP3'UTR (TDP43 autoregulation reporter) | This paper                                            | TARDBP Exon 6 and 3'UTR | Forward | ATATTGTACATTGGCGAGTCTCTTTGTGGA                                |
|                                                            |                                                       |                         | Reverse | ATATGGCCGAGGCGCCATCGTGTTTTCCAGTAAGACTCCAGAC                   |
| pcDNA3.1-NLS-mCherry-NES (shuttle-RFP)                     | Addgene (72660, donated by B. Di Ventura and R. Eils) |                         |         |                                                               |
| pFN21A HaloTag PUM2 RBD R6SYE                              | Gift from A. Goldstrohm                               |                         |         |                                                               |
| pTB CFTR A455E TG13T5 (CFTR minigene)                      | Gift from Y. Ayala                                    |                         |         |                                                               |
| pGW1-CMV                                                   | Gift from S. Finkbeiner                               |                         |         |                                                               |
| pCaggs-mCherry                                             | Gift from S. Finkbeiner                               |                         |         |                                                               |
| pSMART Lenti-shTARDBP (human) CAG-TurboRFP-VSVG            | Dharmacon (V3SH11240-224779127)                       |                         |         |                                                               |
| pSMART Lenti-NT shRNA CAG-TurboRFP-VSVG                    | Dharmacon (VSC11719)                                  |                         |         |                                                               |
